# Supplementary material
Source: Springer Nature journal article supplement (https://www.springermedizin.de/resource/supplementary/12885_2012_3342_MOESM6_ESM.pdf/9463276)

Vector

G3

a

To MC3T3  
cells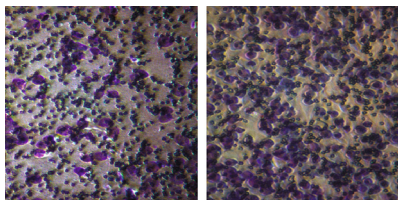To bone  
stromal  
cells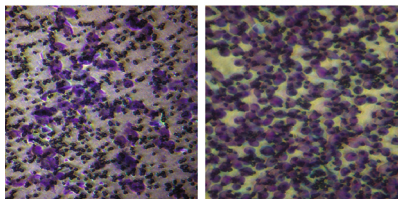

Vector

G3

d

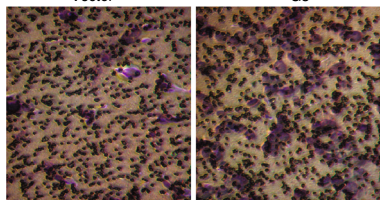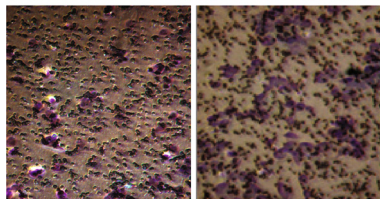

b

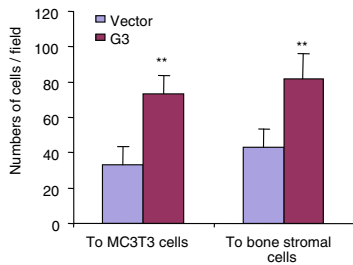

c

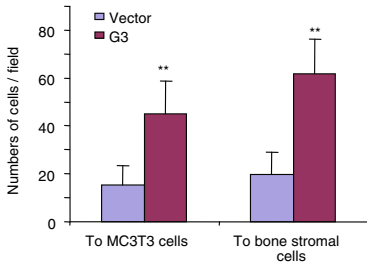

e

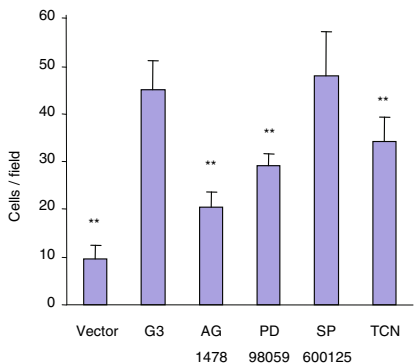

Supplement: MOESM6 [file 9463276]
